# Supplementary material
Source: publisher figshare collection journal article supplement (https://karger.figshare.com/ndownloader/files/38287797)
Supplement: Supplementary file 1 [file 38287797]

**Supplemental video 1.** Video nystagmography shows right-beating horizontal-torsional spontaneous nystagmus.
